# Supplementary material
Source: PubMed Central journal article supplement (PMC4820768)
Supplement: NIHMS753831-supplement-01.pdf [file NIHMS753831-supplement-01.pdf]

## Supplementary material

**Supplementary Table 1. For Females: Cohort-Specific Estimates for Newly Incident Drinking (%) per Age-pair and Year-pair. Data From United States National Survey On Drug Use And Health 2-Year Restricted Data Analysis System (Unweighted n~210,000 12-25 Year Olds)<sup>a</sup>**

| Panel A. Estimated Annual Incidence      |          |            |            |            |            |            |          |
|------------------------------------------|----------|------------|------------|------------|------------|------------|----------|
| Age-pair                                 | 12-13    | 14-15      | 16-17      | 18-19      | 20-21      | 22-23      | 24-25    |
| <b>Year-pair</b>                         |          |            |            |            |            |            |          |
| 2002 or 2003                             | 6.5      | 22.2       | 30.3       | 30.9       | 32.5       | 13.5       | 4.6      |
| 2004 or 2005                             | 6.6      | 21.8       | 28.7       | 31.4       | 32.8       | 13.5       | 2.8      |
| 2006 or 2007                             | 5.4      | 20.4       | 27.8       | 32.7       | 35.3       | 12.7       | 3.5      |
| 2008 or 2009                             | 5.4      | 18.7       | 25.7       | 29.1       | 36.4       | 15.8       | 5.3      |
| 2010 or 2011                             | 4.9      | 17.6       | 24.4       | 27.8       | 36.2       | 18.0       | 6.1      |
| 2012 or 2013                             | 3.7      | 15.8       | 24.6       | 27.4       | 36.3       | 17.5       | 4.2      |
| <b>Meta-analysis Summary<sup>b</sup></b> | 5.4      | 19.4       | 26.9       | 29.8       | 35.0       | 14.8       | 4.1      |
| Panel B. 95% Confidence Interval         |          |            |            |            |            |            |          |
| 2002 or 2003                             | 5.8, 7.3 | 20.7, 23.7 | 28.3, 32.4 | 28.0, 34.0 | 28.5, 36.7 | 10.6, 17.2 | 3.2, 6.7 |
| 2004 or 2005                             | 5.8, 7.3 | 20.4, 23.3 | 26.7, 30.7 | 28.6, 34.2 | 29.3, 36.5 | 10.7, 17.1 | 1.7, 4.7 |
| 2006 or 2007                             | 4.7, 6.1 | 19.0, 21.8 | 25.9, 29.8 | 29.7, 35.8 | 31.6, 39.2 | 9.9, 16.1  | 2.3, 5.4 |
| 2008 or 2009                             | 4.7, 6.1 | 17.4, 20.1 | 23.9, 27.6 | 26.3, 31.9 | 32.5, 40.5 | 12.4, 20.0 | 3.4, 8.2 |
| 2010 or 2011                             | 4.3, 5.6 | 16.3, 19.0 | 22.7, 26.2 | 25.4, 30.4 | 32.7, 39.9 | 14.1, 22.7 | 3.8, 9.5 |
| 2012 or 2013                             | 3.2, 4.3 | 14.5, 17.1 | 22.9, 26.3 | 25.0, 29.9 | 32.9, 39.8 | 13.9, 21.7 | 2.5, 7.0 |
| <b>Meta-analysis Summary<sup>b</sup></b> | 4.5, 6.3 | 17.4, 21.4 | 25.0, 28.8 | 28.1, 31.5 | 33.5, 36.5 | 13.1, 16.6 | 3.2, 5.0 |

<sup>a</sup>. Cells with the same shade trace the experience of individual cohort-pairs.

<sup>b</sup>. Meta-analytic summary estimates using random-effect model.

**Supplementary Table 2. For Males: Cohort-Specific Risk Estimates for Newly Incident Drinking (%) per Age-pair and Year-pair. Data From United States National Survey On Drug Use And Health 2-Year Restricted Data Analysis System (Unweighted n~210,000 12-25 Year Olds)<sup>a</sup>**

| <b>Panel A. Estimated Annual Incidence</b> |              |              |              |              |              |              |              |
|--------------------------------------------|--------------|--------------|--------------|--------------|--------------|--------------|--------------|
| <b>Age-pair</b>                            | <b>12-13</b> | <b>14-15</b> | <b>16-17</b> | <b>18-19</b> | <b>20-21</b> | <b>22-23</b> | <b>24-25</b> |
| <b>Year-pair</b>                           |              |              |              |              |              |              |              |
| 2002 or 2003                               | 5.9          | 16.5         | 25.5         | 27.9         | 32.8         | 12.3         | 8.4          |
| 2004 or 2005                               | 5.6          | 16.9         | 26.3         | 28.9         | 29.4         | 13.0         | 2.0          |
| 2006 or 2007                               | 5.1          | 16.6         | 26.7         | 31.4         | 33.4         | 15.6         | 6.4          |
| 2008 or 2009                               | 4.8          | 15.7         | 26.0         | 30.9         | 34.4         | 16.3         | 4.3          |
| 2010 or 2011                               | 4.3          | 14.7         | 24.1         | 30.5         | 39.4         | 15.8         | 5.7          |
| 2012 or 2013                               | 3.2          | 12.7         | 22.6         | 28.1         | 35.2         | 17.6         | 4.2          |
| <b>Meta-analysis Summary<sup>b</sup></b>   | 4.8          | 15.4         | 25.1         | 29.7         | 34.2         | 15.0         | 4.8          |
| <b>Panel B. 95% Confidence Interval</b>    |              |              |              |              |              |              |              |
| 2002 or 2003                               | 5.2, 6.6     | 15.3, 17.8   | 23.7, 27.5   | 25.1, 30.9   | 28.3, 37.5   | 8.8, 16.9    | 5.3, 13.1    |
| 2004 or 2005                               | 4.9, 6.4     | 15.7, 18.3   | 24.3, 28.3   | 26.1, 31.8   | 25.4, 33.8   | 9.3, 17.7    | 0.8, 4.7     |
| 2006 or 2007                               | 4.4, 5.8     | 15.2, 18.0   | 24.8, 28.6   | 28.7, 34.3   | 29.4, 37.6   | 11.4, 21.1   | 4.0, 10.0    |
| 2008 or 2009                               | 4.1, 5.6     | 14.5, 17.1   | 24.2, 27.9   | 28.5, 33.5   | 30.8, 38.2   | 12.3, 21.4   | 2.4, 7.4     |
| 2010 or 2011                               | 3.7, 4.9     | 13.5, 16.0   | 22.5, 25.6   | 27.9, 33.3   | 35.4, 43.5   | 12.2, 20.2   | 3.2, 10.0    |
| 2012 or 2013                               | 2.7, 3.8     | 11.7, 13.9   | 21.0, 24.2   | 25.6, 30.8   | 31.8, 38.7   | 13.8, 22.1   | 2.3, 7.6     |
| <b>Meta-analysis Summary<sup>b</sup></b>   | 4.0, 5.6     | 14.1, 16.9   | 23.8, 26.4   | 28.5, 30.9   | 31.6, 36.7   | 13.3, 16.8   | 3.0, 6.6     |

<sup>a</sup> Cells with the same shade trace the experience of individual cohort-pairs.

<sup>b</sup> Meta-analytic summary estimates using random-effect model.

**Supplementary Figure S1. Estimated Age- and Cohort-specific Annual Drinking Incidence in 9 Different Female Cohorts. Data From United States National Survey On Drug Use And Health 2-Year Restricted Data Analysis System (Unweighted n~195,000 12-24 Year Old)**

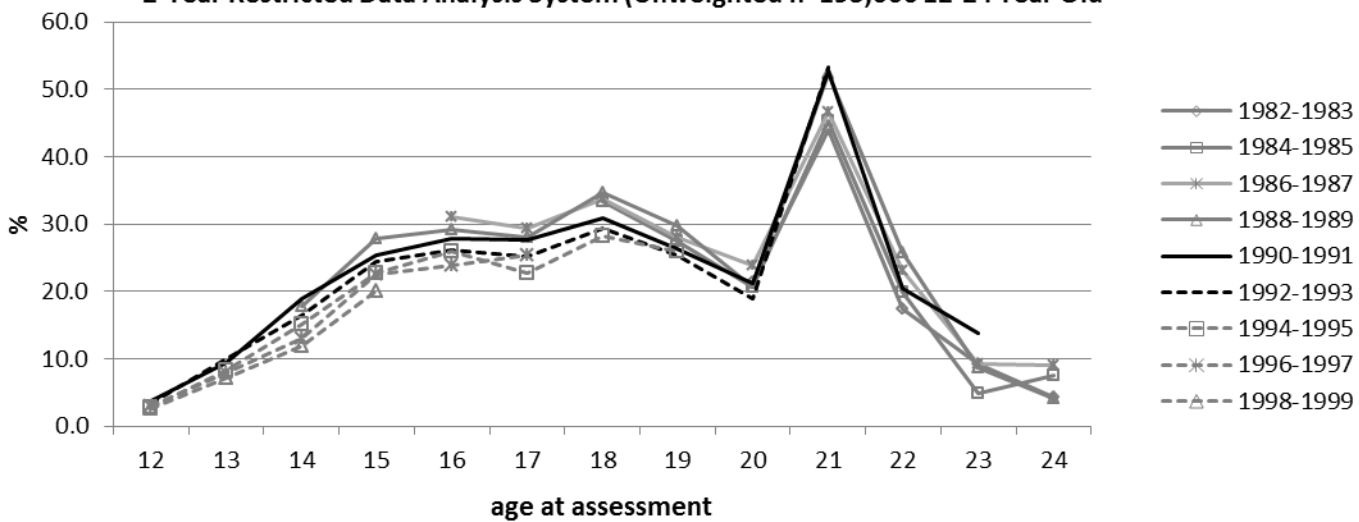

Supplementary Figure S2. Estimated Age- and Cohort-specific Annual Drinking Incidence in 9 Different Male Cohorts, Data From United States National Survey On Drug Use And Health 2-Year Restricted Data Analysis System (Unweighted n~195,000 12-24 Year Olds)

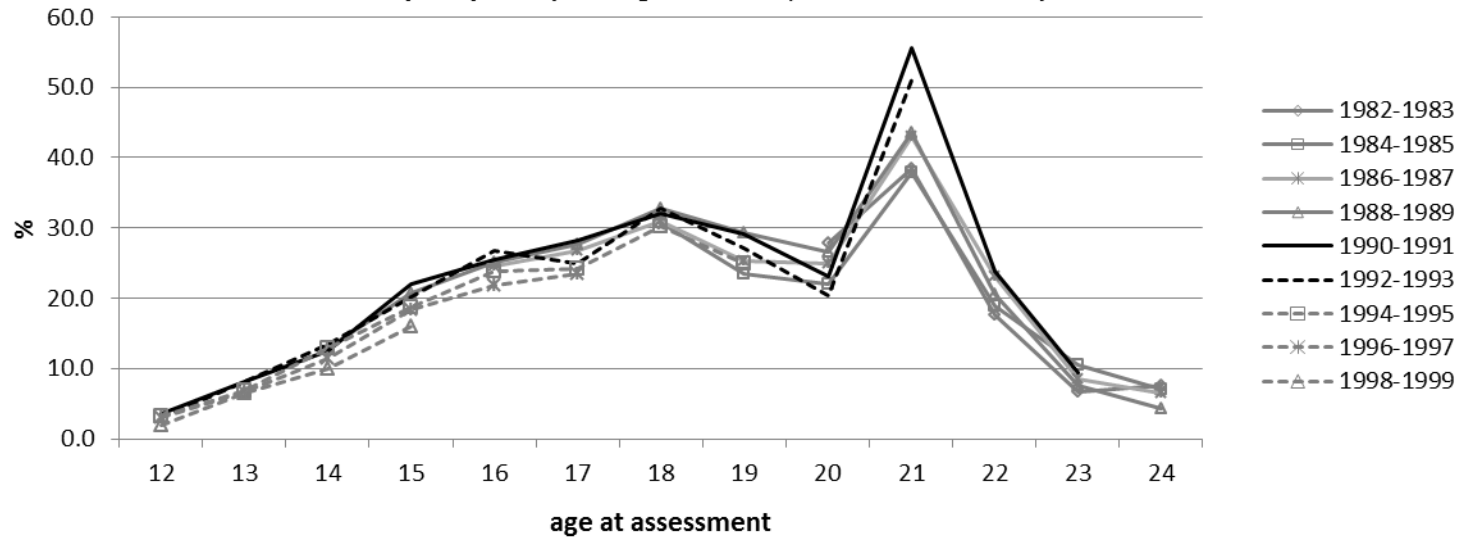

**Supplementary Table S4. For Females: Age-, Cohort-, and Time-Specific Estimates for Lifetime Cumulative Proportion of Drinking Among Survivors (i.e., Ever Drinking, %) Per Year-Pair. Data From United States National Survey on Drug Use and Health 2-Year Restricted Data Analysis System (Unweighted n~195,000 12-24 Year Olds) <sup>a</sup>**

| age              | 12                                                       | 13         | 14         | 15         | 16         | 17         | 18         | 19         | 20         | 21         | 22         | 23         | 24         |
|------------------|----------------------------------------------------------|------------|------------|------------|------------|------------|------------|------------|------------|------------|------------|------------|------------|
| <b>Year-pair</b> | <b>Panel A. Estimated Lifetime Cumulative proportion</b> |            |            |            |            |            |            |            |            |            |            |            |            |
| 2002/3           | 10.9                                                     | 23.4       | 37.1       | 54.8       | 64.1       | 71.9       | 77.4       | 82.3       | 84.6       | 89.7       | 89.3       | 88.2       | 88.1       |
| 2004/5           | 9.2                                                      | 22.1       | 35.8       | 50.7       | 61.7       | 70.5       | 76.2       | 79.9       | 83.5       | 88.8       | 87.7       | 88.2       | 87.4       |
| 2006/7           | 8.6                                                      | 19.9       | 34.5       | 49.2       | 59.2       | 66.0       | 74.5       | 81.4       | 84.5       | 89.3       | 88.5       | 88.0       | 87.9       |
| 2008/9           | 8.6                                                      | 17.5       | 32.0       | 46.2       | 57.4       | 62.9       | 72.9       | 78.3       | 82.3       | 89.8       | 91.1       | 89.0       | 90.6       |
| 2010/1           | 6.6                                                      | 15.5       | 27.9       | 43.7       | 53.6       | 60.3       | 67.2       | 75.1       | 80.6       | 88.9       | 90.2       | 90.2       | 90.3       |
| 2012/3           | 5.2                                                      | 12.0       | 23.9       | 38.9       | 49.8       | 59.6       | 66.1       | 75.2       | 79.2       | 87.9       | 89.9       | 91.1       | 91.3       |
|                  | <b>Panel B. 95% Confidence Interval</b>                  |            |            |            |            |            |            |            |            |            |            |            |            |
| 2002/3           | 9.7, 12.2                                                | 21.6, 25.2 | 35.1, 39.1 | 52.6, 56.9 | 62.1, 66.1 | 70.0, 73.8 | 75.3, 79.4 | 80.4, 84.1 | 82.4, 86.5 | 87.9, 91.2 | 87.5, 90.8 | 86.5, 89.6 | 86.3, 89.6 |
| 2004/5           | 8.1, 10.4                                                | 20.5, 23.9 | 33.9, 37.9 | 48.6, 52.7 | 59.5, 63.8 | 68.4, 72.6 | 74.1, 78.2 | 77.8, 81.9 | 81.7, 85.2 | 87.1, 90.2 | 85.9, 89.3 | 86.6, 89.7 | 85.5, 89.2 |
| 2006/7           | 7.5, 9.9                                                 | 18.3, 21.7 | 32.5, 36.5 | 47.0, 51.5 | 57.1, 61.3 | 64.0, 68.0 | 72.2, 76.7 | 79.4, 83.3 | 82.6, 86.2 | 87.6, 90.9 | 86.6, 90.1 | 86.2, 89.6 | 85.7, 89.8 |
| 2008/9           | 7.4, 9.9                                                 | 15.9, 19.1 | 29.9, 34.2 | 44.1, 48.2 | 55.2, 59.5 | 60.8, 65.0 | 70.7, 75.0 | 76.1, 80.4 | 80.2, 84.1 | 88.1, 91.2 | 89.5, 92.6 | 87.2, 90.6 | 89.2, 91.8 |
| 2010/1           | 5.6, 7.7                                                 | 14.1, 17.1 | 26.0, 29.8 | 41.6, 45.8 | 51.4, 55.7 | 57.9, 62.5 | 64.9, 69.5 | 72.7, 77.3 | 78.3, 82.7 | 87.1, 90.4 | 88.5, 91.7 | 88.7, 91.6 | 88.6, 91.8 |
| 2012/3           | 4.4, 6.2                                                 | 10.7, 13.4 | 22.1, 25.8 | 36.9, 41.1 | 47.7, 52.0 | 57.4, 61.8 | 63.6, 68.5 | 72.8, 77.4 | 77.0, 81.2 | 86.1, 89.5 | 88.3, 91.2 | 89.6, 92.4 | 89.8, 92.6 |

<sup>a</sup> Cells with the same shade trace the experience of individual cohort-pairs.

**Supplementary Table S5. For Males: Age-, Cohort-, and Time-Specific Estimates for Lifetime Cumulative Proportion of Drinking Among Survivors (i.e., Ever Drinking, %) Per Year-Pair. Data From United States National Survey on Drug Use and Health 2-Year Restricted Data Analysis System (Unweighted n~195,000 12-24 Year Olds)<sup>a</sup>**

| Age              | 12                                                       | 13         | 14         | 15         | 16         | 17         | 18         | 19         | 20         | 21         | 22         | 23         | 24         |
|------------------|----------------------------------------------------------|------------|------------|------------|------------|------------|------------|------------|------------|------------|------------|------------|------------|
| <b>Year-pair</b> | <b>Panel A. Estimated Lifetime Cumulative Proportion</b> |            |            |            |            |            |            |            |            |            |            |            |            |
| 2002/3           | 13.6                                                     | 24.5       | 35.9       | 51.1       | 61.8       | 71.6       | 77.1       | 81.4       | 87.7       | 90.6       | 92.1       | 92.0       | 92.2       |
| 2004/5           | 11.5                                                     | 21.7       | 33.6       | 49.4       | 59.9       | 68.8       | 74.9       | 82.2       | 86.1       | 90.3       | 89.8       | 90.9       | 91.6       |
| 2006/7           | 10.9                                                     | 19.3       | 33.4       | 46.1       | 59.5       | 67.6       | 74.0       | 80.2       | 85.0       | 90.2       | 89.7       | 92.7       | 91.9       |
| 2008/9           | 10.6                                                     | 18.7       | 32.1       | 43.8       | 56.6       | 63.6       | 73.3       | 80.8       | 83.8       | 89.0       | 91.9       | 91.7       | 92.7       |
| 2010/1           | 7.3                                                      | 17.4       | 26.3       | 41.0       | 51.7       | 60.9       | 71.6       | 77.3       | 83.7       | 90.1       | 90.5       | 93.0       | 92.5       |
| 2012/3           | 7.2                                                      | 13.4       | 23.3       | 34.8       | 47.8       | 59.4       | 67.0       | 73.2       | 80.8       | 88.8       | 91.1       | 91.7       | 92.0       |
|                  | <b>Panel B. 95% Confidence Interval</b>                  |            |            |            |            |            |            |            |            |            |            |            |            |
| 2002/3           | 12.2, 15.0                                               | 22.8, 26.2 | 33.9, 37.8 | 49.2, 53.1 | 59.8, 63.8 | 69.6, 73.4 | 75.0, 79.0 | 79.2, 83.4 | 85.8, 89.4 | 89.0, 92.0 | 90.6, 93.4 | 90.4, 93.4 | 90.7, 93.5 |
| 2004/5           | 10.2, 12.9                                               | 20.1, 23.4 | 31.7, 35.6 | 47.3, 51.5 | 57.8, 62.0 | 66.7, 70.8 | 72.8, 76.9 | 80.2, 84.1 | 84.3, 87.8 | 88.5, 91.9 | 87.8, 91.5 | 89.2, 92.3 | 89.9, 93.0 |
| 2006/7           | 9.7, 12.2                                                | 17.7, 21.0 | 31.5, 35.3 | 44.0, 48.4 | 57.5, 61.5 | 65.5, 69.7 | 71.8, 76.0 | 77.6, 82.6 | 83.0, 86.7 | 88.5, 91.7 | 87.8, 91.4 | 91.2, 94.0 | 90.1, 93.4 |
| 2008/9           | 9.3, 12.2                                                | 17.0, 20.5 | 30.2, 34.1 | 41.7, 45.9 | 54.5, 58.7 | 61.5, 65.6 | 71.3, 75.3 | 78.8, 82.6 | 81.7, 85.8 | 87.3, 90.6 | 90.3, 93.3 | 89.9, 93.1 | 91.3, 93.9 |
| 2010/1           | 6.4, 8.4                                                 | 15.8, 19.1 | 24.5, 28.2 | 38.9, 43.1 | 49.6, 53.8 | 58.8, 62.9 | 69.4, 73.8 | 75.2, 79.3 | 81.6, 85.5 | 88.3, 91.6 | 88.8, 92.0 | 91.6, 94.2 | 90.8, 93.9 |
| 2012/3           | 6.1, 8.4                                                 | 11.9, 15.0 | 21.6, 25.2 | 32.8, 36.9 | 45.6, 49.9 | 57.3, 61.4 | 64.6, 69.3 | 70.6, 75.6 | 78.7, 82.8 | 87.1, 90.3 | 89.4, 92.5 | 90.0, 93.2 | 90.3, 93.4 |

<sup>a</sup> Cells with the same shade trace the experience of individual cohort-pairs.

**Supplementary Figure S3. For Females: Forest Plots For Age-Specific Newly Incident Drinking (%/Year). Data From United States National Surveys On Drug Use And Health 2-Year Restricted Data Analysis System (Unweighted n~195,000 12-24 Year Olds)**

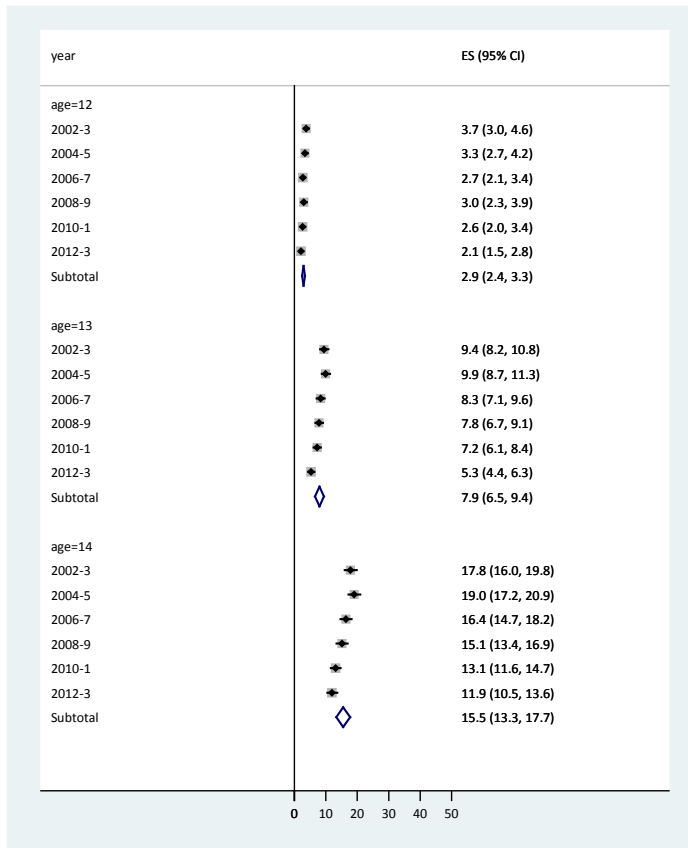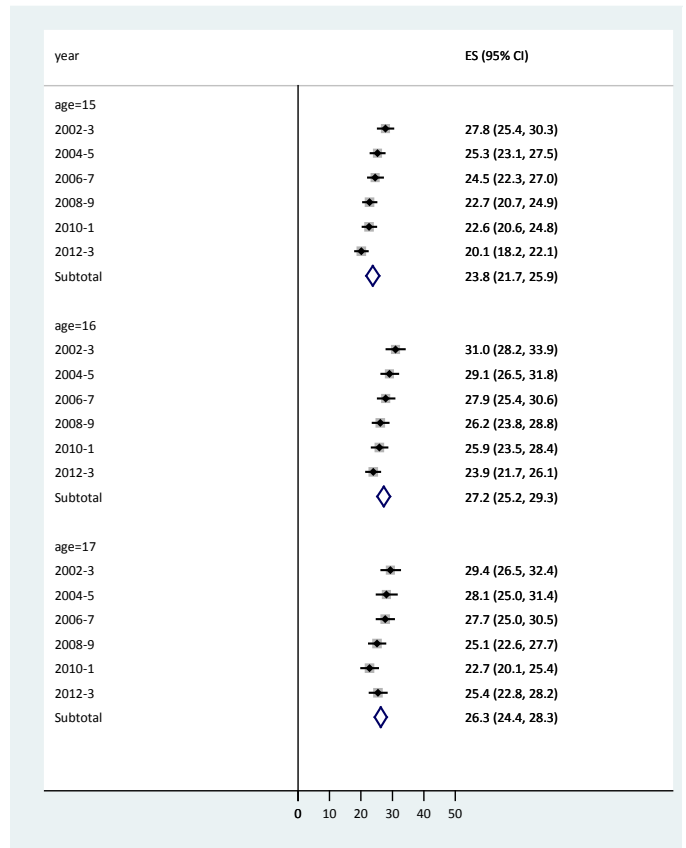

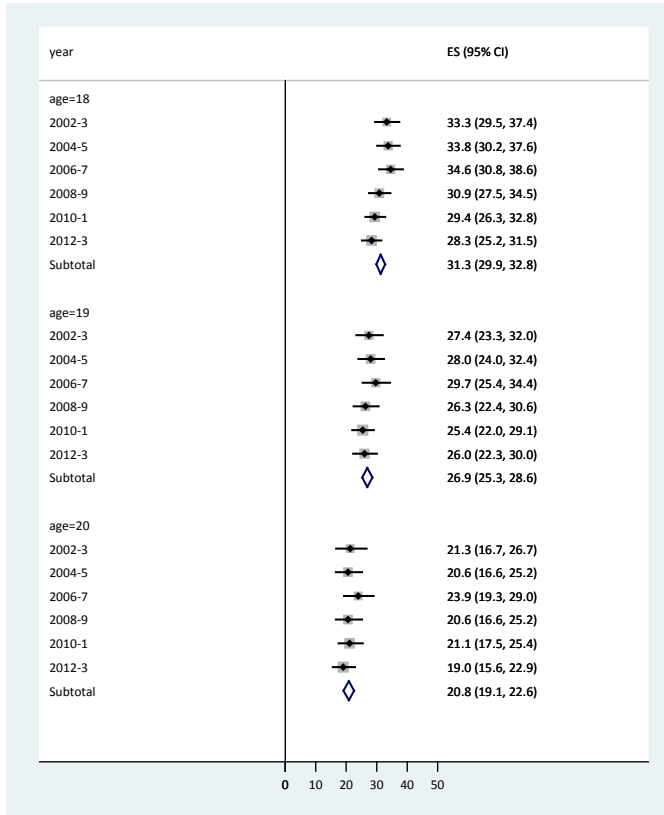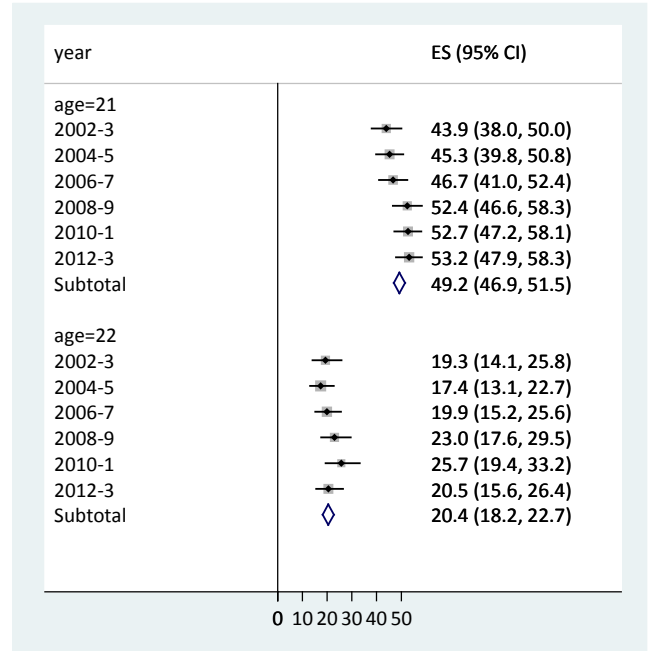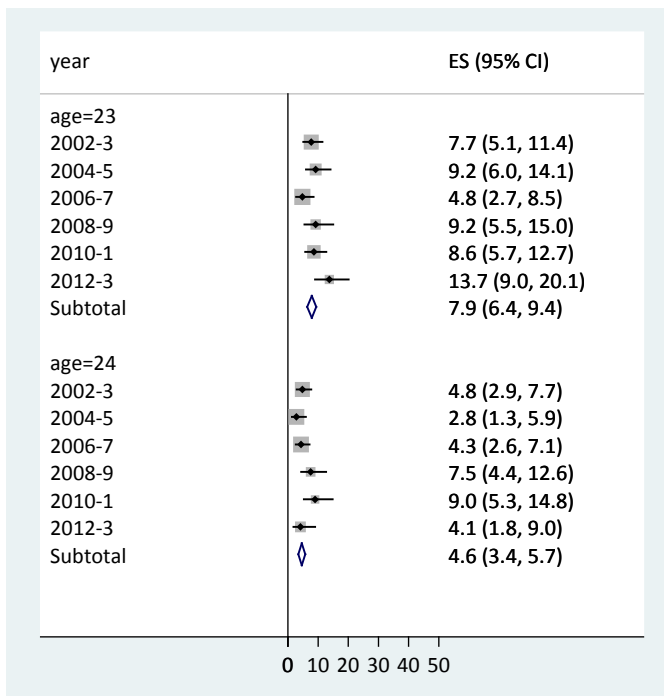

Note: The 'Subtotal' estimate depicted as a diamond shows the meta-analysis summary estimate's 95% confidence bounds, with the point estimate positioned along a line segment as might be used to connect top and bottom vertices. For 12-17 year olds, heterogeneity across replications motivated use of the random effects variance estimation approach. Fixed-effect model was used for other age groups.



**Supplementary Figure S4. For Males: Forest Plots For Age-Specific Newly Incident Drinking (%/Year). Data From United States National Surveys On Drug Use And Health 2-Year Restricted Data Analysis System (Unweighted n~195,000 12-24 Year Olds)**

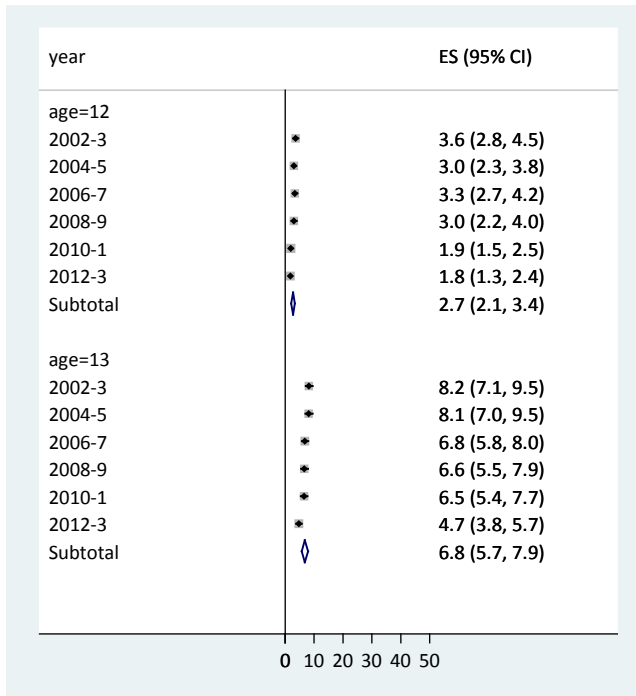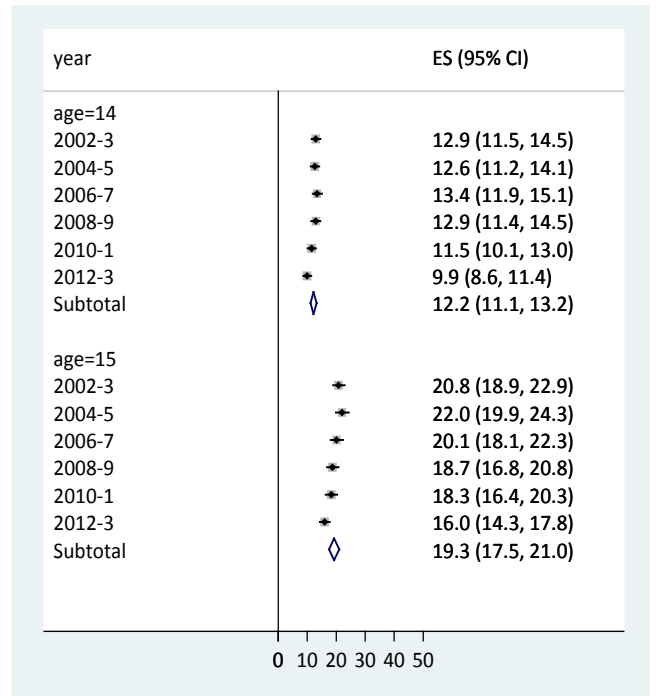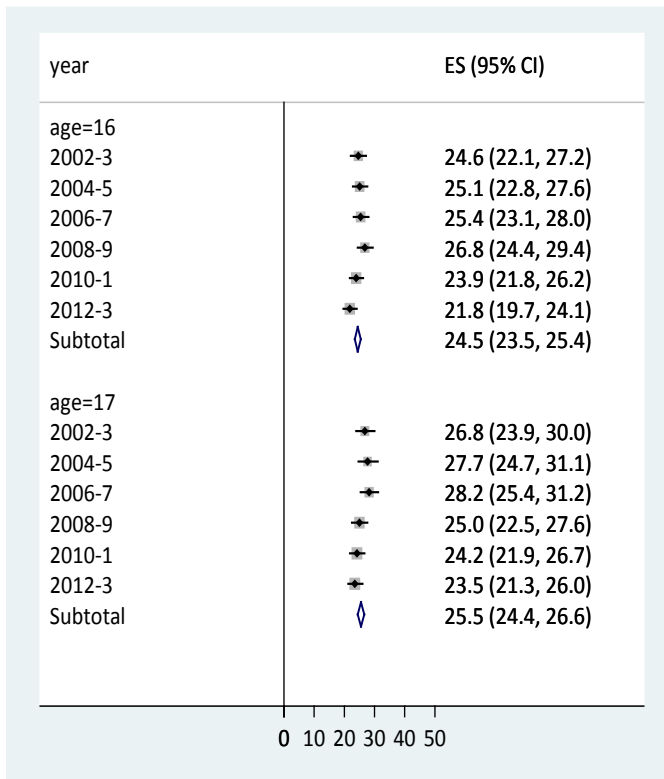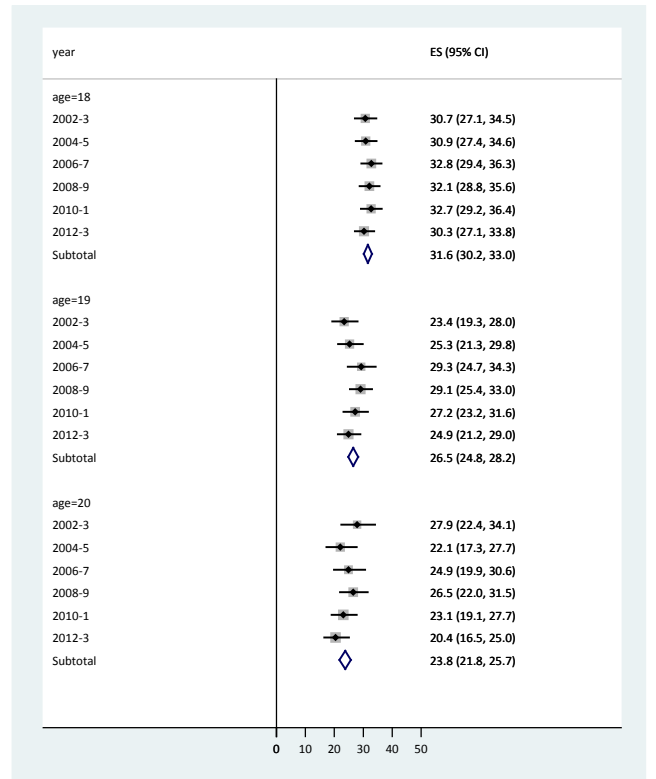

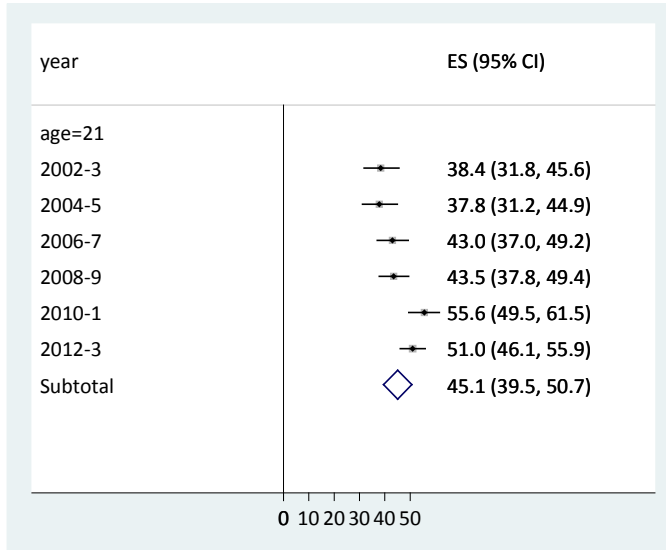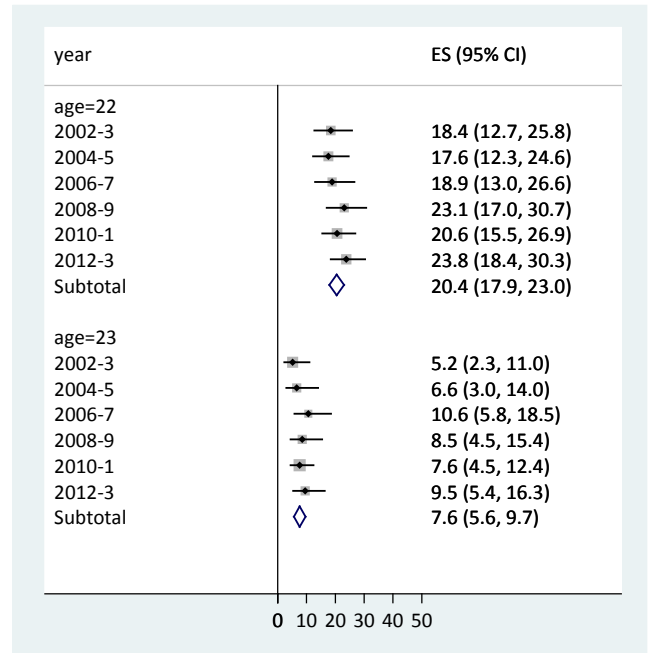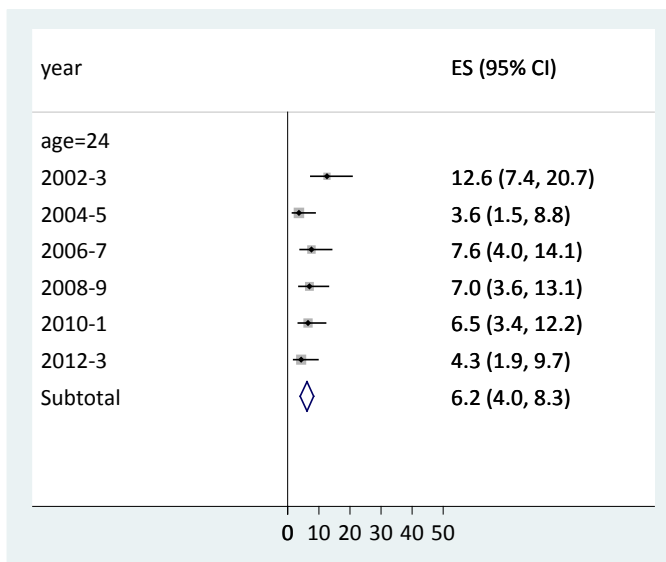

Note: The 'Subtotal' estimate depicted as a diamond shows the meta-analysis summary estimate's 95% confidence bounds, with the point estimate positioned along a line segment as might be used to connect top and bottom vertices. For 12-15, 21, and 24 year olds, heterogeneity across replications motivated use of the random effects variance estimation approach. Fixed-effect model was used for other age groups.
